# Supplementary material
Source: ML conference proceedings conference paper supplement (https://proceedings.neurips.cc/paper_files/paper/2016/hash/d757719ed7c2b66dd17dcee2a3cb29f4-Abstract.html)
Supplement: Supplementary file 1 [file d757719ed7c2b66dd17dcee2a3cb29f4-Supplemental.zip]

Archive with 1 entries (1 files):
- supplement.pdf
