# Supplementary material
Source: ML conference proceedings conference paper supplement (https://proceedings.neurips.cc/paper_files/paper/2016/hash/d757719ed7c2b66dd17dcee2a3cb29f4-Abstract.html)
Supplement: Supplementary file 1 [file d757719ed7c2b66dd17dcee2a3cb29f4-Supplemental.zip › supplement.pdf]

## 341 Appendix

### 342 A Accelerated Proximal Algorithm

---

#### Algorithm 1 Accelerated Proximal Algorithm

---

**Inputs:**  $X, \mathbf{y}$ .  
**Initialize:**  $\{\theta_i^0\}_{i=1}^k = \{0\}$ ,  $\alpha_0 = 0$ ,  $\eta > 0$ ,  $0 < \beta < 1$ .  
**for**  $t = 0, 1, \dots, T$  **do**  
    Set  $\eta^{t+1} = \eta$ .  
    **while** true **do**  
        **for**  $i = 1, \dots, k$  **do**  
             $\tilde{\theta}_i^{t+1} = \Pi_{\Omega_i}(\theta_i^t - \eta^{t+1} \nabla f_{\theta_i}(\theta^t))$   
        **end for**  
        **if**  $f(\tilde{\theta}^{t+1}) \leq f(\theta^t) + \nabla^T f(\theta^t)(\tilde{\theta}^{t+1} - \theta^t) + \frac{1}{2\eta^{t+1}}(\sum_{i=1}^k \|\tilde{\theta}_i^{t+1} - \theta_i^t\|_2^2)$  **then**  
            break  
        **end if**  
         $\eta^{t+1} = \beta \eta^{t+1}$   
    **end while**  
     $\alpha_{t+1} = \frac{1 + \sqrt{1 + 4\alpha_t^2}}{2}$ ,  $\theta_i^{t+1} = \tilde{\theta}_i^{t+1} + \frac{\alpha_t - 1}{\alpha_{t+1}}(\tilde{\theta}_i^{t+1} - \theta_i^t)$   
**end for**

---

343 In this section, we propose a general purpose algorithm for solving problem (2). For convenience,  
 344 with  $\theta = \sum_{i=1}^k \theta_i$ , we set  $f(\theta) = f(\sum_{i=1}^k \theta_i) = \|\mathbf{y} - X\theta\|_2^2$  and  $\Omega_i = \{\theta_i | R_i(\theta_i) \leq R_i(\theta_i^*)\}$ .  
 345 While the norms  $R_i(\cdot)$  may be non-smooth, one can design a general algorithm as long as the  
 346 proximal operators  $\Pi_{\Omega_i}(v) = \operatorname{argmin}_{u \in \Omega_i} \|u - v\|_2^2$  for each set  $\Omega_i$  can be efficiently computed.  
 347 The algorithm is simply the proximal gradient method [23], where each component  $\theta_i$  is cyclically  
 348 updated in each iteration (see Algorithm 1):

$$\begin{aligned}
 \tilde{\theta}_i^{t+1} &= \operatorname{argmin}_{\theta_i \in \Omega_i} \langle \nabla_{\theta_i} f(\theta^t), \theta_i - \theta_i^t \rangle + \frac{1}{2\eta^{t+1}} \|\theta_i - \theta_i^t\|_2^2, \\
 &= \operatorname{argmin}_{\theta_i \in \Omega_i} \|\theta_i - (\theta_i^t - \eta^{t+1} \nabla_{\theta_i} f(\theta^t))\|_2^2,
 \end{aligned} \tag{29}$$

349 where  $\eta^{t+1}$  is the learning rate. To determine a proper  $\eta^{t+1}$ , we use a backtracking step [4]. Starting  
 350 from a constant  $\eta^{t+1} = \eta$ , in each step we first update  $\tilde{\theta}_i^{t+1}$ ; then we decide whether  $\tilde{\theta}_i^{t+1}$  satisfies  
 351 condition:

$$f(\tilde{\theta}^{t+1}) \leq f(\theta^t) + \nabla^T f(\theta^t)(\tilde{\theta}^{t+1} - \theta^t) + \frac{1}{2\eta^{t+1}} \left( \sum_{i=1}^k \|\tilde{\theta}_i^{t+1} - \theta_i^t\|_2^2 \right). \tag{30}$$

352 If the condition (30) does not hold, then we decrease  $\eta^{t+1}$  till (30) is satisfied. Based on existing  
 353 results [4], the basic method can be accelerated by setting the starting point of the next iteration  $\theta_i^{t+1}$   
 354 as a proper combination of  $\tilde{\theta}_i^{t+1}$  and  $\theta_i^t$ . By [4], one can use the updates:

$$\theta_i^{t+1} = \tilde{\theta}_i^{t+1} + \frac{\alpha_t - 1}{\alpha_{t+1}} (\tilde{\theta}_i^{t+1} - \theta_i^t), \quad \text{where} \quad \alpha_{t+1} = \frac{1 + \sqrt{1 + 4\alpha_t^2}}{2}. \tag{31}$$

355 Convergence of Algorithm 1 has been studied in [4]. The backtracking step ensures that the conver-  
 356 gence of algorithm 1. The work [4] also give the convergence rate of Algorithm 1, which is  $O(1/t^2)$ .  
 357 Therefore, we can always reach a stationary point of problem (2) using Algorithm 1.

### 358 B Related Work

359 Structured superposition models have been studied in recent literatures. Early work focus on the  
 360 case when  $k=2$  and noise  $\omega = 0$ , and assume specific structures such as sparse+sparse [14], and  
 361 low-rank+sparse [11]. [16] analyze error bound for low-rank and sparse matrix decomposition  
 362 with noise. Recent work have considered more generalized models and structures. [1] analyze the

decomposition of a low-rank matrix plus another matrix with generalized structure. [15] propose an estimator for the decomposition of two generalized structured matrices, while one of them has a random rotation. Because of the increase in practical application and non-trivial of such problem, people have begun to work on unified frameworks for superposition model. In [30], the authors generalize the noiseless matrix decomposition problem to arbitrary number of superposition under random orthogonal measurement. [31] consider the superposition of structures of structures captured by decomposable norm, while [19] consider general norms but with a different measurement model, involving componentwise random rotations. These two papers are similar in spirit to our work, so we briefly discuss and differentiate our work from these papers. [31] consider a general framework for superposition model, and give a high-probability bound for the following estimation problem:

$$\min_{\theta_i, i=1, \dots, k} \left\| y - X \sum_{i=1}^k \theta_i \right\|_2^2 + \sum_{i=1}^k \lambda_i R_i(\theta_i) \quad (32)$$

they assume each  $R_i(\cdot)$  to be a special kind of norm called decomposable norm. the authors used a different approach for RE condition. They decompose  $\|X \sum_{i=1}^k \Delta_i\|_2$  into two parts. One is

$$\frac{1}{n} \|X \Delta_i\|_2^2 \geq \kappa \|\Delta_i\|_2^2, \quad (33)$$

which characterizes the restricted eigenvalue of each error cone. The other is

$$\frac{2}{n} |\sum_{i < j} \langle X \Delta_i, X \Delta_j \rangle| \leq \frac{\kappa}{2} \sum_{i=1}^k \|\Delta_i\|_2^2, \quad (34)$$

which characterizes the interaction between different error cones. (34) is a strong assumption, and RE condition can hold without it. If  $\Delta_i$  and  $\Delta_j$  are positively correlated, then large interaction terms will make our RE condition stronger. Therefore their results are restricted.

[18] consider an estimator like (2), which is

$$\min_{\theta_i, i=1, \dots, k} \left\| y - X \sum_{i=1}^k Q_i \theta_i \right\|_2^2 \text{ s.t. } R_i(\theta_i) \leq R_i(\theta_i^*), \quad i = 1, \dots, k, \quad (35)$$

where  $Q_i$  are known random rotations. Problem (35) is then transformed into a geometric problem: whether  $k$  random cones intersect. The componentwise random rotation can ensure that any kind of combination can be recovered with high probability. However, in practical problems, we need not have such random rotations available as part of the measurements. Further, their analysis is primarily focused on the noiseless case.

## C Noiseless Case: Comparing Estimators

In this section, we present a comparative analysis of estimator

$$\min_{\{\theta_i\}} \sum_{i=1}^k \lambda_i R_i(\theta_i) \text{ s.t. } X \sum_{i=1}^k \theta_i = y \quad (36)$$

with the proposed estimator (2) in the noiseless case, i.e.,  $\omega = 0$ . In essence, we show that the two estimators have similar recovery conditions, but the existing estimator (36) needs additional structure for unique decomposition of  $\theta$  into the components  $\{\hat{\theta}_i\}$ .

The estimator (36) needs to consider the so-called “infimal convolution” [25, 31] over different norms to get a (unique) decomposition of  $\theta$  in terms of the components  $\{\hat{\theta}_i\}$ . Denote

$$R(\theta) = \min_{\{\theta_i\}: \sum_i \theta_i = \theta} \sum_{i=1}^k \lambda_i R_i(\theta_i). \quad (37)$$

Results in [25] show that (37) is also a norm. Thus estimator (36) can be rewritten as

$$\min_{\theta} R(\theta) \text{ s.t. } X\theta = y. \quad (38)$$

Interestingly, the above discussion separates the estimation problem in (36) into two parts—solving (38) to get  $\hat{\theta}$ , and then solving (37) to get the components  $\{\hat{\theta}_i\}$ . The problem (38) is a simple structured recovery problem, and is well studied [10, 27]. Using infimal convolution based decomposition problem (37) to get the components  $\{\hat{\theta}_i\}$  will be our focus in the sequel.

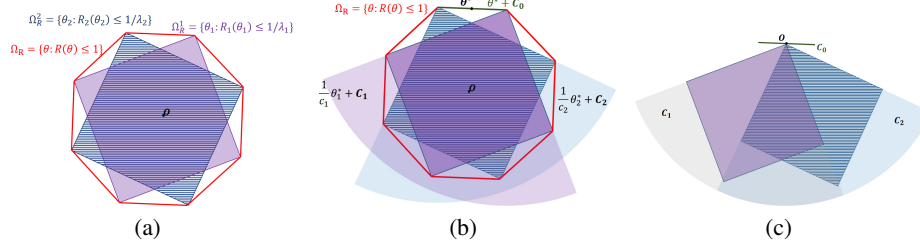

Figure 3: **(a)** The relationship of different norm balls when  $k = 2$ . The blue and purple polygons are the norm ball of norms  $R_1(\cdot)$  and  $R_2(\cdot)$  respectively. The red line is the outline of  $R(\cdot)$  norm ball. Note that for any point in the red line, we will be able to decompose it to the two vertexes around it. Consider the case when  $k = 2$ . Let  $c_i = \lambda_i R_i(\theta_i)$  for  $i = 1, 2$ . **(b)** is the structure of error around the true value  $\theta^*$ . The green segment  $C_0$  is a subspace determined by  $\theta_1^*$  and  $\theta_2^*$ . For the superposition in (a), error of  $\theta^*$  is composed of three parts:  $\theta^* + C_0$ ,  $\frac{1}{c_1}\theta_1^* + C_1$  and  $\frac{1}{c_2}\theta_2^* + C_2$ . In **(c)**, we move the green segment and two error cones to the origin, then the uniquely recovery condition is that if we reflect one of the three structures, their intersection remains  $\{0\}$ .

398 To get some properties of decomposition (37), we consider the unit norm balls for norm  $R(\cdot)$  and  
 399 component norms  $R_i(\cdot)$ :

$$\Omega_R = \{\theta \in \mathbb{R}^p : R(\theta) \leq 1\} \quad \text{and} \quad \Omega_R^i = \{\theta_i \in \mathbb{R}^p : R_i(\theta_i) \leq 1\}, i = 1, \dots, k.$$

400 The norm balls are related by the following result, we give the proof in appendix K.1.

401 **Lemma 5** For a given set  $\{\lambda_i\}$ , the infimal convolution norm ball  $\Omega_R$  is the convex hull of  
 402  $\bigcup_{i=1}^k \frac{1}{\lambda_i} \Omega_R^i$ , i.e.,  $\Omega_R = \text{conv}(\bigcup_{i=1}^k \frac{1}{\lambda_i} \Omega_R^i)$ .

403 Lemma 5 illustrates what the decomposition (37) should be like. If  $\theta$  is a point on the surface of the  
 404 norm ball  $\Omega_R$ , then the value of  $R(\theta)$  is the convex combination of some  $\theta_i$  on the surface of  $\frac{1}{\lambda_i} \Omega_R^i$   
 405 such that  $R_i(\theta_i) = R(\theta)$ . Hence if  $\theta$  can be successfully decomposed into different components  
 406 along the direction of  $\theta_i$ , then we should be able to connect  $\theta_i$  and  $\theta$  by a surface on the  $R(\cdot)$  norm  
 407 ball, or they have to be “close”. Interestingly, the above intuition of “closeness” between different  
 408 components  $\theta_i$  can be described in the language of cones, in a way similar to the structural coherence  
 409 property discussed in Section 3.

410 Given the intuition above, we state the main result below. Proof is given in Appendix K.2.

411 **Theorem 7** Given  $\hat{\theta}_1, \dots, \hat{\theta}_k$  and define

$$C_0 = \left\{ \sum_{\theta_i \neq 0} \left( \frac{c'_i}{c_i} - 1 \right) \theta_i \mid c'_i \geq 0, \sum_{i=1}^k c'_i = 1 \right\}. \quad (39)$$

412 Suppose  $\dim(\text{span}\{\theta_i\}) = k$ , then there exist  $\lambda_1, \dots, \lambda_k$  such that  $\sum_{i=1}^k \hat{\theta}_i = \theta$  are unique solutions  
 413 of (37) if and only if there are  $c_1, \dots, c_k$  with  $c_i \geq 0$  and  $\sum_{i=1}^k c_i = 1$  such that for the corresponding  
 414 error cone  $C_i$  of  $\hat{\theta}_i$  and  $C_0$  defined above,  $-C_0 \cap \sum_{j \neq i} C_j = \{0\}$ , for  $i = 0, 1, \dots, k$ .

415 Theorem 7 illustrate that the successful decomposition of (37) requires an additional condition, i.e.,  
 416  $-C_0 \cap \sum_{i=1}^k C_i = \{0\}$  beyond that is needed by the SC condition (see Section 3). The additional  
 417 condition needs us to choose parameters  $\{\lambda_i\}$  properly. Theorem 7 shows that  $\{\lambda_i\}$  depends on  
 418 both  $\{\theta_i^*\}$  and  $\{c_i\}$ . For appropriate  $\{\theta_i^*\}$ , there may be a range of  $\{c_i\}$  such that the solution is  
 419 unique. Therefore, in noiseless situation, if we know  $\{R_i(\theta_i^*)\}$ , then solving estimator (36) would be  
 420 a better idea, because it requires less condition to recover the true value and we do not need to choose  
 421 parameters  $\{\lambda_i\}$ .

## 422 D Examples

423 In this section, we instantiate the general error bounds on concrete problems, the proofs are provided  
 424 in appendix J.

## D.1 Morphological Component Analysis Using L1 Norm

In Morphological Component Analysis [14], we want to separate a sparse vector  $\theta_1$  and another vector  $\theta_2$  which is sparse under a rotation  $Q$  from their sum. In [14], the authors introduced a quantity

$$M = \max_{i,j} |Q_{ij}|. \quad (40)$$

For small enough  $M$ , if the sum of their sparsity is lower than a constant related to  $M$ , we can recovery them. We show that for two given sparse vectors, our SC condition is more general.

Consider the following estimator

$$\min_{\theta_1, \theta_2} \|y - X(\theta_1 + \theta_2)\|_2^2 \quad s.t. \quad \|\theta_1\|_1 \leq \|\theta_1^*\|_1, \|Q\theta_2\|_1 \leq \|Q\theta_2^*\|_1, \quad (41)$$

where vector  $y \in \mathbb{R}^n$  is the observation, vectors  $\theta_1, \theta_2 \in \mathbb{R}^p$  are the parameters we want to estimate, matrix  $X \in \mathbb{R}^{n \times p}$  is a sub-Gaussian random design, matrix  $Q \in \mathbb{R}^{p \times p}$  is orthogonal. We assume  $\theta_1$  and  $Q\theta_2$  are  $s_1$ -sparse and  $s_2$ -sparse vectors respectively. It is easy to see that  $\|Q\cdot\|_1$  is still a norm. Suppose  $s_1 = 1, s_2 = 1$ , and the  $i$ -th entry of  $\theta_1$  and the  $j$ -th entry of  $Q\theta_2$  are non-zero. If

$$Q_{ij} \text{sign}(\theta_1^*)_i \text{sign}(Q\theta_2^*)_j > 0,$$

then we have

$$\rho \geq \sqrt{(1 - \sqrt{1 - Q_{ij}^2})/2}. \quad (42)$$

Thus we will have chance to separate  $\theta_1$  and  $\theta_2$  successfully. It is easy to see that  $M$  is lower bounded by  $\theta_1^T Q\theta_2$ . Large  $\theta_1^T Q\theta_2$  leads to larger  $M$ , but also leads to larger  $\rho$ , which is better for separating  $\theta_1$  and  $\theta_2$ . The proof of above bound of  $\rho$  is given in appendix J.1.

In general, it is difficult for us to derive a lower bound of  $\rho$  like 42. Instead, we can derive the following sufficient condition in terms of  $M$ :

**Theorem 8** If  $M \leq \frac{1}{8\sqrt{s_1 s_2}}$ , then for problem (41) with high probability

$$\|\theta_1 - \theta_1^*\|_2 + \|\theta_2 - \theta_2^*\|_2 = O\left(\max\left\{\sqrt{\frac{s_1 \log p}{n}}, \sqrt{\frac{s_2 \log p}{n}}\right\}\right).$$

When  $s_1 = s_2 = 1$ , this condition  $M \leq \frac{1}{8\sqrt{s_1 s_2}}$  is much stronger than (42), because every entry of  $Q$  has to be smaller than  $1/8$ ;

## D.2 Morphological Component Analysis Using $k$ -support Norm

$k$ -support norm [2] is another way to induce sparse solution instead of L1 norm. Recent works [2, 12] have shown that  $k$ -support norm has better statistical guarantee than L1 norm. For arbitrary  $\theta \in \mathbb{R}^p$ , its  $k$ -support norm  $\|\theta\|_k^{sp}$  is defined as

$$\|\theta\|_k^{sp} = \inf \left\{ \sum_{I \in \mathcal{G}_k} \|u_I\|_2 : \text{supp}(u_I) \subseteq I, \sum_{I \in \mathcal{G}_k} u_I = \theta \right\}.$$

For the superposition of an  $s_1$  sparse vector and an  $s_2$  sparse vector, the best choice is to use  $s_1$ -support norm and  $s_2$ -support norm. The new problem is

$$\min_{\theta_1, \theta_2} \|y - X(\theta_1 + \theta_2)\|_2^2 \quad s.t. \quad \|\theta_1\|_{s_1}^{sp} \leq \|\theta_1^*\|_{s_1}^{sp}, \|Q\theta_2\|_{s_2}^{sp} \leq \|Q\theta_2^*\|_{s_2}^{sp}. \quad (43)$$

Denote  $\sigma_{s_1, s_2}(Q)$  as the set of all the largest singular values of  $Q$ 's  $s_1 \times s_2$  submatrices. Let  $\sigma = \max \sigma_{s_1, s_2}(Q)$ . In this case, we have the following sufficient condition and high probability error bound:

**Theorem 9** If  $\sigma \leq \frac{1}{4(1 + \frac{\theta_{1max}}{\theta_{1min}})(1 + \frac{\theta_{2max}}{\theta_{2min}})}$  where  $\theta_{max} = \max_{i \in \text{supp}(\theta)} |\theta_i|$  and  $\theta_{min} = \min_{i \in \text{supp}(\theta)} |\theta_i|$ , then we have for problem (43) with high probability

$$\|\theta_1 - \theta_1^*\|_2 + \|\theta_2 - \theta_2^*\|_2 = O\left(\max\left\{\sqrt{\frac{s_1 \log(p - s_1)}{n}}, \sqrt{\frac{s_2 \log(p - s_2)}{n}}\right\}\right).$$

In the problem setting of theorem 9, both norms are not decomposable. Therefore we can not apply the framework of [31] for this problem.

### D.3 Low-rank and Sparse Matrix Decomposition

To recover a sparse matrix and low-rank matrix from their sum [8, 11], one can use  $k$ -support norm [2] to induce sparsity and nuclear norm to induce low-rank. These two kinds of norm ensure that the sparsity and the rank of the estimated matrices are small. If we have  $k > 1$ , the framework in [31] is not applicable, because  $k$ -support norm is not decomposable. When  $k = 1$ , the component norms simplify to  $\|\cdot\|_1$  for sparsity.

Suppose we have a rank- $r$  matrix  $L^*$  and a sparse matrix  $S^*$  with  $s$  nonzero entries,  $S^*, L^* \in \mathbb{R}^{d_1 \times d_2}$ . Our observation  $Y$  comes from the following problem

$$Y_i = \langle X_i, L^* + S^* \rangle + E_i, i = 1, \dots, n,$$

where each  $X_i \in \mathbb{R}^{d_1 \times d_2}$  is a sub-Gaussian random design matrix.  $E_i$  is the noise matrix. We want to recover  $S^*$  and  $L^*$  using  $s$ -support norm and nuclear norm respectively, so that the estimator takes the form:

$$\min_{L, S} \sum_{i=1}^n (Y_i - \langle X_i, L + S \rangle)^2 \quad s.t. \quad \|L\|_* \leq \|L^*\|_*, \|S\|_s^{sp} \leq \|S^*\|_s^{sp}. \quad (44)$$

By using Theorem 6, and existing results on Gaussian widths, the error bound is given by

**Theorem 10** *If there is a  $\rho > 0$  for problem (44), then with high probability*

$$\|L - L^*\|_2 + \|S - S^*\|_2 = O \left( \max \left\{ \sqrt{\frac{s \log(d_1 d_2 - s)}{n}}, \sqrt{\frac{r(d_1 + d_2 - r)}{n}} \right\} \right).$$

Theorem 10 requires SC condition to hold. When will SC condition for (44) holds? Early work have shown that to successfully estimate both  $L$  and  $S$ , the low-rank matrix  $L$  should satisfy ‘‘incoherence’’ condition [8]. From example in Appendix J.5, we can recovery matrix  $L$  and  $S$  even incoherence condition does not hold.

## E Additional Experiments

### E.1 Recovery using $k$ -support norm

In our last experiment, we test the impact of sparsity on the estimation error. In this experiment we solve problem (43), and let both  $s_1$  and  $s_2$  vary from 2 to 3. We set the matrix  $Q$  to be a  $p \times p$  discrete cosine transformation (DCT) matrix [14]. We use different problem size with  $p = 100$  and  $p = 150$ . Number of samples  $n$  varies from 30 to 70. For each  $n$ , we generate 20 pairs of  $X$  and  $\omega$ . For each  $(X, \omega)$  pair, we get a solution  $\hat{\theta}_1$  and  $\hat{\theta}_2$ . We take the average over all  $\|\hat{\theta}_1 - \theta_1^*\|_2 + \|\hat{\theta}_2 - \theta_2^*\|_2$ . The plot is shown in figure 4. From figure 4, we can see that the error curve increases as dimensionality and sparsity increases. If  $p$  is fixed, then lower sparsity implies better estimation result.

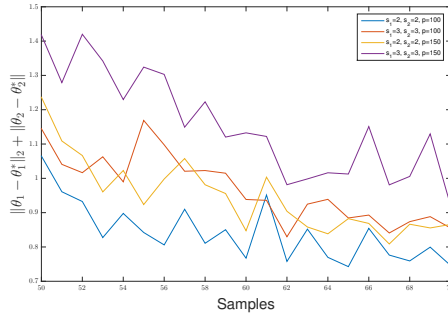

Figure 4: Effect of sparsity  $s_1, s_2$  on estimation error. In all cases we use  $k$ -support norm instead of  $l_1$  norm.

## 484 F Proof of Theorem 1

485 **Theorem 11 (Deterministic bound)** Assume that the RE condition in (6) is satisfied in  $\mathcal{C}$  with  
 486 parameter  $\kappa$ . Then, if  $\kappa^2 > \gamma$ , we have  $\sum_{i=1}^k \|\Delta_i\|_2 \leq 2s_n(\gamma)$ .

487 *Proof:* By feasibility of  $\theta^*$  and optimality of  $\hat{\theta}$ , we have

$$\|Y - X\hat{\theta}\|_2^2 \leq \|Y - X\theta^*\|_2^2.$$

488 If  $\hat{\theta} = \sum_i \hat{\theta}_i$  is an optimum of (2), we have

$$\|Y - X\hat{\theta}\|_2^2 = \|X(\hat{\theta} - \theta^*)\|_2^2 - 2\omega^T X(\hat{\theta} - \theta^*) + \|\omega\|_2^2.$$

489 With  $\Delta = \hat{\theta} - \theta^*$ ,  $\Delta_i = \hat{\theta}_i - \theta_i^*$ , we have

$$\|Y - X\hat{\theta}\|_2^2 - \|Y - X\theta^*\|_2^2 = \|X\Delta\|_2^2 - 2\omega^T X\Delta \leq 0. \quad (45)$$

490 For any  $\Delta = \sum_{i=1}^k \Delta_i$ ,  $\Delta_i \in \mathcal{C}_i$ , if possible let  $\sum_{i=1}^k \|\Delta_i\|_2 \geq 2s_n(\gamma)$ . Then we have

$$\frac{1}{n}(\|X\Delta\|_2^2 - 2\omega^T X\Delta) \geq \left(\sum_{i=1}^k \|\Delta_i\|_2\right)^2 (\kappa^2 - \gamma) > 0. \quad (46)$$

491 since  $\kappa^2 > \gamma$ . However, the inequality contradicts (45). Therefore  $\sum_{i=1}^k \|\Delta_i\|_2 \leq 2s_n(\gamma)$ . ■

## 492 G Geometry of Structural Coherence

493 In this section, our goal is to characterize the geometric property of our SC condition. We start from  
 494 a simple case when  $k = 2$ .

### 495 G.1 Proof of Lemma 2

496 **Lemma 6** If there exists a  $\delta < 1$  such that  $-\langle x, y \rangle \leq \delta \|x\|_2 \|y\|_2$ , then

$$\|x + y\|_2 \geq \sqrt{\frac{1-\delta}{2}} (\|x\|_2 + \|y\|_2). \quad (47)$$

497 *Proof:* We know from [19] that

$$\|x + y\|_2^2 \geq (1 - \delta)(\|x\|_2^2 + \|y\|_2^2)$$

498 and

$$(\|x\|_2 + \|y\|_2)^2 \leq 2(\|x\|_2^2 + \|y\|_2^2)$$

499 Combine them and we will get the conclusion. ■

### 500 G.2 Proof of Theorem 3

501 **Theorem 12 (Structural Coherence (SC) Condition)** Let  $\delta := \max_i \delta_i$  with  $\delta_i$  as defined in (14).  
 502 If  $\delta < 1$ , there exists a  $\rho > 0$  such that for any  $\Delta_i \in \mathcal{C}_i$ ,  $i = 1, \dots, k$ , the SC condition in (9) holds,  
 503 i.e.,

$$\left\| \sum_{i=1}^k \Delta_i \right\|_2 \geq \rho \sum_{i=1}^k \|\Delta_i\|_2. \quad (48)$$

504 *Proof:* We have by lemma (2)

$$\|\sum_i \Delta_i\|_2 \geq \sqrt{\frac{1-\delta}{2}} \left( \|\Delta_{i'}\|_2 + \left\| \sum_{j \neq i'} \Delta_j \right\|_2 \right).$$

505 Sum over all possible combinations, we get

$$k \|\sum_i \Delta_i\|_2 \geq \sqrt{\frac{1-\delta}{2}} \sum_{i'} \left( \|\Delta_{i'}\|_2 + \left\| \sum_{j \neq i'} \Delta_j \right\|_2 \right) \geq \sqrt{\frac{1-\delta}{2}} \sum_{i'} \|\Delta_{i'}\|_2.$$

506 Therefore

$$\left\| \sum_{i=1}^k \Delta_i \right\|_2 \geq \frac{1}{k} \sqrt{\frac{1-\delta}{2}} \sum_{i=1}^k \|\Delta_i\|_2.$$

507 ■

## 508 H Restricted Eigenvalue Condition

### 509 H.1 Proof of Lemma 2

510 **Lemma 7** *Let sets  $\mathcal{C}$  and  $\mathcal{A}$  be as defined in (7) and (19) respectively. If the SC condition in (9) holds,*  
 511 *then the marginal tail functions of the two sets have the following relationship:*

$$Q_{\rho\xi}(\mathcal{H}; Z) \geq Q_{\xi}(\mathcal{A}; Z). \quad (49)$$

512 *Proof:* By definition, for any  $u \in \mathcal{H}$ , we can find  $u_i \in \mathcal{C}_i, i = 1, 2, \dots, k$  and  $\sum_{i=1}^k u_i = u$ . Then

$$|\langle Z, u \rangle| = \left\| \sum_{i=1}^k u_i \right\|_2 \left| \left\langle Z, \frac{u}{\left\| \sum_{i=1}^k u_i \right\|_2} \right\rangle \right| \geq \rho \left| \left\langle Z, \frac{u}{\left\| \sum_{i=1}^k u_i \right\|_2} \right\rangle \right|.$$

513 Let  $v = \frac{u}{\left\| \sum_{i=1}^k u_i \right\|_2}$ , from definition we know that  $v \in \mathcal{A}$ . Hence we also have

$$P(|\langle Z, u \rangle| \geq \rho\xi) = P\left(\frac{1}{\rho} |\langle Z, u \rangle| \geq \xi\right) \geq P(|\langle Z, v \rangle| \geq \xi).$$

514 Therefore taking the infimum over all  $v \in \mathcal{A}$  and then all  $u \in \mathcal{C}$ , the conclusion holds.  $\blacksquare$

### 515 H.2 Proof of Theorem 4

516 **Theorem 13 (Restricted Eigenvalue Condition)** *Let  $X$  be the sub-Gaussian design matrix that*  
 517 *satisfies the assumptions above. If the SC condition (9) holds with a  $\rho > 0$ , then with probability at*  
 518 *least  $1 - \exp(-t^2/2)$ , we have*

$$\inf_{u \in \mathcal{H}} \|Xu\|_2 \geq c_1 \rho \sqrt{n} - c_2 w(\mathcal{H}) - c_3 \rho t \quad (50)$$

519 where  $c_1, c_2$  and  $c_3$  are positive constants determined by  $\sigma_x, \sigma_\omega$  and  $\alpha$ .

520 *Proof:* Let two sets  $\mathcal{C}$  and  $\mathcal{A}$  be as defined previously. From Lemma (1) and lemma (2) we know  
 521 that for any  $\xi > 0$ , with probability at least  $1 - e^{-t^2/2}$

$$\inf_{u \in \mathcal{H}} \|Xu\|_2 \geq \rho\xi \sqrt{n} Q_{2\xi}(\mathcal{A}; Z) - 2W(\mathcal{H}; Z) - \rho\xi t. \quad (51)$$

522 We use the "Bowling scheme" in [27], let  $\mathbf{v}$  be any vector in  $\mathcal{A}$ , by Paley-Zygmund inequality [6],  
 523 one can get

$$P(|\langle x, v \rangle| \geq 2\xi) \geq \frac{[E|\langle x, v \rangle| - 2\xi]_+^2}{E|\langle x, v \rangle|^2} \geq \frac{(\alpha - 2\xi)^2}{4\sigma_x^2}. \quad (52)$$

524 From the proof of [27, Theorem 6.3], empirical width can be bounded by

$$W(\mathcal{H}; Z) \leq L\sigma_x w(\mathcal{H}) \quad (53)$$

525 Select  $\xi = \alpha/6$ , combine (51), (52), (53) to discover that:

$$\inf_{u \in \mathcal{C}} \|Xu\|_2 \geq \frac{1}{9} \rho \alpha^3 \sigma_x^{-2} \sqrt{n} - 2L\sigma_x w(\mathcal{H}) - \rho \frac{\alpha}{6} \tau$$

526 which completes the proof.  $\blacksquare$

527 From the conclusion above, the right hand side contains three parts. The first part is a constant times  
 528 the square root of sample size, and the second part is a measure of the complexity of error sets.  
 529 Therefore, when the number of samples is large enough or the error set has low complexity, the right  
 530 terms will be larger than zero.

### 531 H.3 Proof of Proposition 5

532 **Proposition 14** *If there is a matrix  $X$  such that condition (6) holds for  $\Delta_i \in \mathcal{C}_i$ , then SC (9) holds.*

533 *Proof:* If such  $\rho$  does not exist, then there are some  $\Delta_i \in \mathcal{C}_i, i = 1, \dots, k$  not all zero such that

$$\left\| \sum_{i=1}^k \Delta_i \right\|_2 = 0 \Rightarrow \sum_{i=1}^k \Delta_i = 0,$$

534 which implies  $\|X \sum_{i=1}^k \Delta_i\|_2 = 0$  for every  $X$ . This is a contradiction.  $\blacksquare$

## I Error Bound

### I.1 Proof of Lemma 3

**Lemma 8** Let design  $X \in \mathbb{R}^{n \times p}$  be a row-wise i.i.d. sub-Gaussian random matrix, and noise  $\omega \in \mathbb{R}^n$  be a centered sub-Gaussian random vector. Then  $s_n(\gamma) \leq c \frac{w(\bar{\mathcal{H}})}{\gamma\sqrt{n}}$  for some constant  $c > 0$  with probability at least  $1 - c_1 \exp(-c_2 w^2(\bar{\mathcal{H}})) - c_3 \exp(-c_4 n)$ . Constant  $c$  depends on  $\sigma_x$  and  $\sigma_\omega$ .

*Proof:* First notice that

$$\omega^T X \Delta = \|\omega\|_2 \cdot \frac{\omega X \Delta}{\|\omega\|_2}.$$

We can first bound  $\frac{\omega X \Delta}{\|\omega\|_2}$  then bound  $\|\omega\|_2$ .

**(a). Bound  $\frac{\omega X \Delta}{\|\omega\|_2}$ :** Note that  $\frac{\omega X \Delta}{\|\omega\|_2}$  is not centered. In the first step we center it using

$$\frac{1}{\|\omega\|_2} \epsilon_i \omega_i x_i^T \Delta,$$

where  $\epsilon_i$  is a Radmacher random variable, its probability of being  $+1$  and  $-1$  are both half.  $x_i \in \mathbb{R}^p$  is the  $i$ -th row of  $X$ . By assumption we know different  $x_i$  are independent and have same distribution.

Here we fix  $\omega$ . By proposition 5.10 in [28], the following bound holds:

$$P\left(\left|\frac{\omega X \Delta}{\|\omega\|_2}\right| \geq t\right) \leq e \cdot \exp\left(-\frac{c_1 t^2}{\sigma_x^2 \|\Delta\|_2}\right). \quad (54)$$

Through simple transform we know that

$$P\left(\left|\left\langle \frac{\omega X}{\|\omega\|_2}, u - v \right\rangle\right| \geq t\right) \leq e \cdot e^{-c_1 t^2 / (\sigma_x^2 \|u - v\|_2^2)}$$

for any  $u, v \in \mathbb{R}^p$ . Then use [26, Theorem 2.2.27]

$$P\left(\sup_{\Delta \in \bar{\mathcal{H}}} \left|\frac{1}{\|\omega\|_2} \sum_i \epsilon_i \omega_i x_i^T \Delta\right| \geq c_2 w(\bar{\mathcal{H}}) + 2c_3 t\right) \leq c_4 \exp\left(-\frac{4c_1 t^2}{\sigma_x^2}\right)$$

**(b). Bound  $\omega$ :** We first notice that  $\|\omega\|_2^2$  is a sub-exponential random variable. Therefore if the sub-gaussian norm of  $\omega$  is  $\|\omega\|_{\phi_2}$ , then for each entry  $\omega_i$  the sub-exponential norm  $\|\omega_i^2\|_{\phi_1} \leq 2\|\omega\|_{\phi_2}^2$ . Through definition we reach:

$$\mathbb{E}\|\omega\|_2 \leq \sqrt{\mathbb{E}\|\omega\|_2^2} \leq \sigma_\omega \sqrt{2n}.$$

Applying proposition 5.16 in [28] to  $\|\omega\|_2^2$ , we obtain

$$P(|\|\omega\|_2^2 - \mathbb{E}\|\omega\|_2^2| \geq t) \leq 2 \exp\left[-c_5 \min\left(\frac{t^2}{4\sigma_\omega^4}, \frac{t}{2\sigma_\omega^2}\right)\right].$$

Replace  $t$  with  $\sigma_\omega^2 n$  gives

$$P(\|\omega\|_2 \geq 2\sigma_\omega \sqrt{n}) \leq 2 \exp(-c_5 n).$$

**Combine (a) and (b):** First we have

$$\begin{aligned} & P\left(\sup_{\Delta \in \bar{\mathcal{H}}} \frac{1}{\sqrt{n}} \left|\sum_i \epsilon_i \omega_i x_i^T \Delta\right| \leq 2c_2 \sigma_x w(\bar{\mathcal{H}}) + 4c_3 \sigma_x t\right) \\ & \geq P\left(\sup_{\Delta \in \bar{\mathcal{H}}} \left|\frac{1}{\|\omega\|_2} \sum_i \epsilon_i \omega_i x_i^T \Delta\right| \geq c_2 w(\bar{\mathcal{H}}) + 2c_3 t \wedge \frac{\|\omega\|_2}{\sqrt{n}} \geq 2\sigma_x\right) \\ & \geq P\left(\sup_{\Delta \in \bar{\mathcal{H}}} \left|\frac{1}{\|\omega\|_2} \sum_i \epsilon_i \omega_i x_i^T \Delta\right| \geq c_2 w(\bar{\mathcal{H}}) + 2c_3 t \mid \omega\right) P\left(\frac{\|\omega\|_2}{\sqrt{n}} \geq 2\sigma_x\right) \\ & \geq 1 - 2 \exp(-c_5 n) - c_4 \exp\left(-\frac{4c_1 t^2}{\sigma_x^2}\right) \end{aligned}$$

554 Then choose  $t = \frac{c_2}{2c_3} w(\bar{\mathcal{H}})$ ,

$$P\left(\sup_{\Delta \in \bar{\mathcal{H}}} \frac{1}{\sqrt{n}} \left| \sum_i \epsilon_i \omega_i x_i^T \Delta \right| \leq 4c_2 \sigma_\omega w(\bar{\mathcal{H}})\right) \geq 1 - c_4 \cdot \exp\left(-\frac{c_1 c_2^2 w(\bar{\mathcal{H}})}{c_3 \sigma_x^2}\right) - 2 \exp(-c_5 n)$$

555 Now we have bounded the symmetrized  $\omega^T X \Delta$ , then  $\omega^T X \Delta$  can be bounded using symmetrization  
556 of probability [17]:

$$\begin{aligned} & P\left(\sup_{\Delta \in \bar{\mathcal{H}}} \frac{1}{\sqrt{n}} |\omega^T X \Delta - E \omega^T X \Delta| > 16c_5 \sigma_\omega w(\bar{\mathcal{H}})\right) \\ & \leq 4P\left(\sup_{\Delta \in \bar{\mathcal{H}}} \frac{1}{\sqrt{n}} \left| \sum_i \epsilon_i \omega_i x_i^T \Delta \right| > 4c_5 \sigma_\omega w(\bar{\mathcal{H}})\right) \leq 4c_4 \cdot \exp\left(-\frac{c_1 c_2^2 w(\bar{\mathcal{H}})}{c_3 \sigma_x^2}\right) + 8 \exp(-c_5 n). \end{aligned}$$

557 Because  $\omega$  has zero mean, there the above inequality give us:

$$\sup_{\Delta \in \bar{\mathcal{H}}} \frac{|\omega^T X \Delta|}{\sqrt{n}} \leq 16c_5 \sigma_\omega w(\bar{\mathcal{H}})$$

558 with high probability. Hence by definition

$$s_n(\gamma) \leq \frac{16c_5 \sigma_\omega w(\bar{\mathcal{H}})}{\gamma \sqrt{n}}$$

559 with probability at least  $1 - 4c_4 \cdot \exp\left(-\frac{c_1 c_2^2 w(\bar{\mathcal{H}})}{c_3 \sigma_x^2}\right) - 8 \exp(-c_5 n)$ . ■

560 Now as we have the high probability bound of both  $\kappa$  and  $s_n(\gamma)$ , we can derive our error bound for  
561 random case.

## 562 I.2 Proof of Lemma 4

563 **Lemma 9 (Gaussian width bound)** *Let  $\mathcal{H}$  and  $\bar{\mathcal{H}}$  be as defined in (7) and (8) respectively. Then, we*  
564 *have  $w(\mathcal{H}) = O(\max_i w(\mathcal{C}_i \cap S_{p-1}) + \sqrt{\log k})$  and  $w(\bar{\mathcal{H}}) = O(\max_i w(\mathcal{C}_i \cap B_p) + \sqrt{\log k})$ .*

565 *Proof:* By definition and the fact that the Gaussian width of convex hull of sets is equal to the  
566 Gaussian width of their union [10]

$$w(\mathcal{H}) = \mathbb{E} \sup_{u \in \mathcal{H}} \langle u, g \rangle = \mathbb{E} \max_i \sup_{u_i \in \mathcal{C}_i \cap S_{p-1}} \langle u_i, g \rangle$$

567 By concentration inequality for Lipschitz functions [17], for each  $i = 1, \dots, k$

$$P\left(\sup_{u_i \in \mathcal{C}_i \cap S_{p-1}} \langle u_i, g \rangle \geq \mathbb{E} \sup_{u_i \in \mathcal{C}_i \cap S_{p-1}} \langle u_i, g \rangle + r\right) \leq \exp(-r^2/2).$$

568 Then denote  $D_i = \sup_{u_i \in \mathcal{C}_i \cap S_{p-1}} \langle u_i, g \rangle$ , we have

$$\begin{aligned} w(\mathcal{H}) &= \mathbb{E} \max_i D_i \\ &\leq \max_i \mathbb{E} D_i + \delta + \sum_{i=1}^k \int_{\delta}^{\infty} P\left(D_i \geq \max_i \mathbb{E} D_i + r\right) dr \\ &\leq \max_i \mathbb{E} D_i + \delta + k \int_{\delta}^{\infty} \exp(-r^2/2) dr \\ &\leq \max_i \mathbb{E} D_i + \delta + \eta' k \exp(-\delta^2/2). \end{aligned}$$

569 Let  $\delta = \sqrt{\log k}$ , we get

$$w(\mathcal{H}) \leq \max_i \mathbb{E} D_i + \sqrt{\log k} + \eta = O\left(\max_i w(\mathcal{C}_i \cap S_{p-1}) + \sqrt{\log k}\right).$$

570 the conclusion holds. The conclusion for  $w(\bar{\mathcal{H}})$  can be proved the same as above. ■

### 571 I.3 Proof of Theorem 6

572 **Theorem 15** For estimator (3), let  $\mathcal{C}_i = \text{cone}\{\Delta : R_i(\theta_i^* + \Delta) \leq R_i(\theta_i^*)\}$ , design  $X$  be a random  
 573 matrix with each row an independent copy of sub-Gaussian random vector  $Z$ , noise  $\omega$  be a centered  
 574 sub-Gaussian random vector, and  $B_p \subseteq \mathbb{R}^p$  be the a centered unit euclidean ball. If sample size  
 575  $n > c(\max_i w^2(\mathcal{C}_i \cap S_{p-1}) + \log k)/\rho^2$ , then with high probability,

$$\sum_{i=1}^k \|\hat{\theta}_i - \theta_i^*\|_2 \leq C \frac{\max_i w(\mathcal{C}_i \cap B_p) + \sqrt{\log k}}{\rho^2 \sqrt{n}}, \quad (55)$$

576 for constants  $c, C > 0$  that depend on sub-Gaussian norms  $\|Z\|_{\phi_2}$  and  $\|\omega\|_{\phi_2}$ .

577 *Proof:* Firstly, we choose

$$t = \frac{1}{3} \alpha^2 \sigma_x^{-2} \sqrt{n} - 6L\sigma_x \rho^{-1} \alpha^{-1} w(\mathcal{H}).$$

578 From theorem 4, RE condition holds for

$$\kappa \geq \frac{1}{2} \left( \frac{1}{9} \rho \alpha^3 \sigma_x^{-2} - 2L\sigma_x \frac{w(\mathcal{H})}{\sqrt{n}} \right)$$

579 with probability at least

$$1 - \exp \left( - \left( \frac{1}{3} \alpha^2 \sigma_x^{-2} \sqrt{n} - 6L\sigma_x \rho^{-1} \alpha^{-1} w(\mathcal{H}) \right)^2 / 2 \right).$$

580 Next we choose  $\gamma = \frac{\rho^2 \alpha^6}{1296 \sigma_x^4}$ , and let  $s_n(\gamma)$  be defined as above. Thus from theorem (1) and our  
 581 discussion above, if

$$\frac{1}{4} \left( \frac{1}{9} \rho \alpha^3 \sigma_x^{-2} - 2L\sigma_x \frac{w(\mathcal{H})}{\sqrt{n}} \right)^2 > \frac{\rho^2 \alpha^6}{1296 \sigma_x^4} \Rightarrow n > c_1 w^2(\mathcal{H}),$$

582 for some constant  $c_1 > 0$ , then  $\kappa > 2\gamma$ . Using theorem 1, we have

$$\sum_{i=1}^k \|\Delta_i\|_2 \leq c_2 \frac{w(\bar{\mathcal{H}})}{\sqrt{n}}.$$

583 with probability at least

$$1 - c_3 \exp(-c_4 w(\bar{\mathcal{H}})) - c_5 \exp(-c_6 n) - \exp(-(c_7 \sqrt{n} - c_8 w(\mathcal{H}))^2),$$

584 which completes the proof. ■

## 585 J Examples

### 586 J.1 Structural Coherence For 1-sparse + 1-sparse MCA

587 **Proposition 16** Suppose both vector  $\theta_1$  and vector  $Q\theta_2$  are one sparse, and the  $i$ -th entry of  $\theta_1$  and  
 588 the  $j$ -th entry of  $Q\theta_2$  are non-zero. If

$$Q_{ij} \text{sign}(\theta_1^*)_i \text{sign}(Q\theta_2^*) > 0,$$

589 then we have

$$\rho \geq \sqrt{(1 - \sqrt{1 - Q_{ij}^2})/2}. \quad (56)$$

590 *Proof:* Denote  $\Delta_{-i}$  as a vector whose  $i$ th entry is 0, and other entries are equal to those of  $\Delta$ .  
 591 Suppose both  $\theta_1$  and  $Q\theta_2$  are 1-sparse vectors, and the  $i$ th entry of  $\theta_1$   $j$ th entry of  $Q\theta_2$  are nonzero.  
 592 Then error vector  $\Delta_1$  and  $\Delta_2$  satisfy the following inequalities:

$$-\langle \text{sign}(\theta_{1i}), \Delta_{1i} \rangle \geq \|\Delta_{1-i}\|_1, -\langle \text{sign}(\theta_{2j}), \Delta_{2j} \rangle \geq \|\Delta_{2-j}\|_1.$$

593 Therefore

$$\frac{-\langle \text{sign}(\theta_{1i}), \Delta_{1i} \rangle}{\|\Delta_1\|_2} \geq \frac{1}{\sqrt{1 + \frac{\|\Delta_{1-i}\|_2^2}{\Delta_{1i}^2}}} \geq \frac{1}{\sqrt{1 + \frac{\|\Delta_{1-i}\|_2^2}{\|\Delta_{1-i}\|_1^2}}} \geq \frac{1}{\sqrt{2}}.$$

594 The same holds for  $Q\Delta_2$ . Then when  $Q_{ij}\text{sign}(\theta_{1i})\text{sign}(Q\theta_{2j}) > 0$  we have from geometry that

$$-\langle \Delta_1, \Delta_2 \rangle \leq -\cos(2 \arccos(\frac{1}{\sqrt{2}}) + \arccos(Q_{ij}\text{sign}(\theta_{1i})\text{sign}(Q\theta_{2j}))) \leq \sqrt{1 - Q_{ij}^2}$$

595 Therefore  $\rho \geq \sqrt{\frac{1 - \sqrt{1 - Q_{ij}^2}}{2}}$  by proposition 2. ■

## 596 J.2 Proof of Theorem 8

597 **Theorem 17** If  $M \leq \frac{1}{8\sqrt{s_1 s_2}}$ , then for problem (41) with high probability

$$\|\theta_1 - \theta_1^*\|_2 + \|\theta_2 - \theta_2^*\|_2 = O\left(\max\left\{\sqrt{\frac{s_1 \log p}{n}}, \sqrt{\frac{s_2 \log p}{n}}\right\}\right).$$

598 *Proof:* Let  $\Delta_i = \theta_i - \theta_i^*$  for  $i = 1, 2$ , then we have

$$\begin{aligned} \langle \Delta_1, \Delta_2 \rangle &= \langle \Delta_1, Q^T Q \Delta_2 \rangle \leq \max_{ij} |Q_{ij}| \|\Delta_1\|_1 \|Q \Delta_2\|_1 \\ &\leq M(\|P_{\Omega} \Delta_1\|_1 + \|P_{\Omega_1^c} \Delta_1\|_1)(\|P_{\Omega_2} Q \Delta_2\|_1 + \|P_{\Omega_2^c} Q \Delta_2\|_1) \\ &\leq 4M \|P_{\Omega} \Delta_1\|_1 \|P_{\Omega_2} Q \Delta_2\|_1 \leq 4M \sqrt{s_1 s_2} \|\Delta_1\|_2 \|Q \Delta_2\|_2 \end{aligned}$$

599 Let  $4M \sqrt{s_1 s_2} \leq \frac{1}{2}$ , we get  $M \leq \frac{1}{8\sqrt{s_1 s_2}}$  and  $\rho \geq \frac{1}{2}$ .

600 From the result of [10], we know that the Gaussian width for the error cone of a  $s$ -sparse vector is  
601  $O(\sqrt{s \log(\frac{p}{s})})$ . Therefore by theorem 6, if  $n \geq C \max_{s \in \{s_1, s_2\}} s \log(\frac{p}{s})$  for some  $C > 0$ , then

$$\|\theta_1 - \theta_1^*\|_2 + \|\theta_2 - \theta_2^*\|_2 = O\left(\max\left\{\sqrt{\frac{s_1 \log p}{n}}, \sqrt{\frac{s_2 \log p}{n}}\right\}\right).$$

602 ■

## 603 J.3 Proof of Theorem 9

604 **Theorem 18** If  $\sigma \leq \frac{1}{4(1 + \frac{\theta_{1max}}{\theta_{1min}})(1 + \frac{\theta_{2max}}{\theta_{2min}})}$  where  $\theta_{max} = \max_{i \in \text{supp}(\theta)} |\theta_i|$  and  $\theta_{min} =$   
605  $\min_{i \in \text{supp}(\theta)} |\theta_i|$ , then we have for problem (43) with high probability

$$\|\theta_1 - \theta_1^*\|_2 + \|\theta_2 - \theta_2^*\|_2 = O\left(\max\left\{\sqrt{\frac{s_1 \log(p - s_1)}{n}}, \sqrt{\frac{s_2 \log(p - s_2)}{n}}\right\}\right).$$

606 *Proof:* We first characterize the interaction between cones:

$$\langle \Delta_1, \Delta_2 \rangle = \langle \Delta_1, Q^T Q \Delta_2 \rangle.$$

607 because  $k$ -support norm is an atomic norm, and its atomic set is all unit  $k$ -sparse vectors. Therefore  
608 we can decompose  $\Delta_1$  into combination of unit  $s_1$ -sparse vectors  $\Delta_1 = \sum_i \alpha_i u_i$  and  $Q\Delta_2$  into  
609 combination of unit  $s_2$ -sparse vectors  $Q\Delta_2 = \sum_j \beta_j v_j$ . Then

$$\langle \Delta_1, Q^T Q \Delta_2 \rangle \leq \sum_i |\alpha_i| \sum_j |\beta_j| \max_{ij} |u_i^T Q^T v_j| \leq \sigma \|\Delta_1\|_{s_1}^{sp} \|\Delta_2\|_{s_2}^{sp}.$$

610 By Theorem 9 in [13], we have

$$\|\Delta_1\|_{s_1}^{sp} \leq \sqrt{2}(1 + \frac{\theta_{1max}}{\theta_{1min}}) \|\Delta_1\|_2 \quad \text{and} \quad \|\Delta_2\|_{s_2}^{sp} \leq \sqrt{2}(1 + \frac{\theta_{2max}}{\theta_{2min}}) \|\Delta_1\|_2.$$

611 Therefore

$$\langle \Delta_1, \Delta_2 \rangle \leq 2\sigma \left(1 + \frac{\theta_{1max}}{\theta_{1min}}\right) \left(1 + \frac{\theta_{2max}}{\theta_{2min}}\right) \|\Delta_1\|_2 \|\Delta_2\|_2.$$

612 Let  $2\sigma \left(1 + \frac{\theta_{1max}}{\theta_{1min}}\right) \left(1 + \frac{\theta_{2max}}{\theta_{2min}}\right) \leq \frac{1}{2}$ , then  $\sigma \leq \frac{1}{4(1 + \frac{\theta_{1max}}{\theta_{1min}})(1 + \frac{\theta_{2max}}{\theta_{2min}})}$  and  $\rho \geq \frac{1}{2}$ .

613 From [13], when we set  $k$  to be the sparsity  $s$ , the corresponding Gaussian width of tangent cone is  
614  $O(s \log(p - s))$ , therefore plus this result in Theorem 6 we get

$$\|\theta_1 - \theta_1^*\|_2 + \|\theta_2 - \theta_2^*\|_2 = O \left( \max \left\{ \sqrt{\frac{s_1 \log(p - s_1)}{n}}, \sqrt{\frac{s_2 \log(p - s_2)}{n}} \right\} \right).$$

615 ■

#### 616 J.4 Proof of Theorem 10

617 **Theorem 19** *If there is a  $\rho > 0$  for problem (44), then with high probability*

$$\|L - L^*\|_2 + \|S - S^*\|_2 = O \left( \max \left\{ \sqrt{\frac{s \log(d_1 d_2 - s)}{n}}, \sqrt{\frac{r(d_1 + d_2 - r)}{n}} \right\} \right).$$

618 *Proof:* From [10], we know that for error cone of  $d_1 \times d_2$  rank- $r$  matrix, its Gaussian width is  
619  $O(r(d_1 + d_2 - r))$ . Therefore if  $\rho > 0$ , then by applying theorem 6, the error bound is

$$\|L - L^*\|_2 + \|S - S^*\|_2 = O \left( \max \left\{ \sqrt{\frac{s \log(d_1 d_2 - s)}{n}}, \sqrt{\frac{r(d_1 + d_2 - r)}{n}} \right\} \right).$$

620 ■

#### 621 J.5 Additional Example for Low-rank and Sparse Matrix Decomposition

622 **Example 1** *Suppose noise  $\omega = 0$ ,*

$$S_0 = L_0 = \begin{pmatrix} 1 & 0 & \dots & 0 \\ 0 & 0 & \dots & 0 \\ \vdots & \vdots & \ddots & \vdots \\ 0 & 0 & \dots & 0 \end{pmatrix}, \quad (57)$$

623 *and  $M = S_0 + L_0$ , then the SC condition of problem (44) holds.*

624 *Proof:* Suppose the singular value decomposition of  $L_0^*$  is  $U\Sigma V^T$ . Denote

$$\mathcal{C}'_S = \{ \Delta \mid \langle \text{sign}(S'_0), \Delta \rangle \geq \|P_{\Omega^c}(\Delta)\|_1 \}, \quad \mathcal{C}'_L = \{ \Delta \mid \langle UV^T, \Delta \rangle \geq \|P_{T^\perp}(\Delta)\|_* \}.$$

625 From [19] we know that SC is equivalent to  $-\mathcal{C}'_S \cap \mathcal{C}'_L = \{0\}$ . To prove  $-\mathcal{C}'_S \cap \mathcal{C}'_L = \{0\}$ , we need  
626 the following inequalities:

$$\langle \text{sign}(S'_0), \Delta \rangle \geq \|P_{\Omega^c}(\Delta)\|_1, \quad -\langle UV^T, \Delta \rangle \geq \|P_{T^\perp}(\Delta)\|_*.$$

627 has unique solution 0.

628 It is easy to notice that  $\langle \text{sign}(S'_0), \Delta \rangle = \langle UV^T, \Delta \rangle = \Delta_{11}$ . As the value of norms is non-negative,  
629 we have  $\Delta_{11} \geq 0$  and  $-\Delta_{11} \geq 0$ . Therefore  $\Delta_{11} = 0$ . Besides,

$$\|P_{\Omega^c}(\Delta)\|_1 = \sum_{(i,j) \neq (1,1)} |\Delta_{ij}| \leq 0,$$

630 which leads to  $\Delta_{ij} = 0$  for  $(i,j) \neq (1,1)$ .

631 Finally,  $\Delta = 0$  and the conclusion holds. ■

632 People tend to think that we cannot obtain the correct decomposition in this situation. Note that the  
633 cone  $\mathcal{C}_S$  is centered at one point, and the cone  $\mathcal{C}_L$  contains  $\mathcal{C}_S$  but their surface contacts only at the  
634 origin. Therefore the reflection of one cone will touch the other cone only at the origin. As a result,  
635 for  $M = M_0 = S_0 + L_0$ , i.e., SC condition holds.

## K Noiseless Case: Comparing Estimators

In this section we try to explore the structures that are different between problem (2) and problem (36) and the structures that they share.

### K.1 Proof of Lemma 5

**Lemma 10** For a given set  $\{\lambda_i\}$ , the infimal convolution norm ball  $\Omega_R$  is the convex hull of  $\bigcup_{i=1}^k \frac{1}{\lambda_i} \Omega_R^i$ , i.e.,  $\Omega_R = \text{conv}(\bigcup_{i=1}^k \frac{1}{\lambda_i} \Omega_R^i)$ .

*Proof:* If  $\theta \in \Omega$ , then from definition there are  $\sum_{i=1}^k \theta_i = \theta$  such that  $R(\theta) = \sum_{i=1}^k \lambda_i R_i(\theta_i)$ . Without loss of generalization, suppose  $\theta_i \neq 0$  for each  $i$ , then we have the following decomposition:

$$\sum_{i=1}^k \frac{\lambda_i R_i(\theta_i)}{R(\theta)} \frac{R(\theta)}{\lambda_i R_i(\theta_i)} \theta_i = \theta. \quad (58)$$

It is easy to know that  $\sum_{i=1}^k \frac{\lambda_i R_i(\theta_i)}{R(\theta)} = 1$  and  $R_i(\frac{R(\theta)}{\lambda_i R_i(\theta_i)} \theta_i) = \frac{1}{\lambda_i} R(\theta) \leq \frac{1}{\lambda_i}$ . Therefore  $\frac{R(\theta)}{\lambda_i R_i(\theta_i)} \theta_i \in \frac{1}{\lambda_i} \Omega_R^i$ , and  $\theta \in \text{conv}(\bigcup_{i=1}^k \frac{1}{\lambda_i} \Omega_R^i)$ .

If  $\theta \in \text{conv}(\bigcup_{i=1}^k \frac{1}{\lambda_i} \Omega_R^i)$ , then we can find  $\theta_i \in \frac{1}{\lambda_i} \Omega_R^i$  and  $c_i > 0$ ,  $\sum_{i=1}^k c_i = 1$  such that

$$\sum_{i=1}^k c_i \theta_i = \theta.$$

Then

$$R(\theta) \leq \sum_{i=1}^k \lambda_i R_i(c_i \theta_i) = \sum_{i=1}^k c_i \lambda_i R_i(\theta_i) \leq 1.$$

Therefore  $\theta \in \Omega_R$  which completes the proof.  $\blacksquare$

### K.2 Proof of theorem 7

**Theorem 20** Given  $\hat{\theta}_1, \dots, \hat{\theta}_k$  and define

$$\mathcal{C}_0 = \left\{ \sum_{\theta_i \neq 0} \left( \frac{c'_i}{c_i} - 1 \right) \theta_i \mid c'_i \geq 0, \sum_{i=1}^k c'_i = 1 \right\}. \quad (59)$$

Suppose  $\dim(\text{span}\{\theta_i\}) = k$ , then there exist  $\lambda_1, \dots, \lambda_k$  such that  $\sum_{i=1}^k \hat{\theta}_i = \theta$  are unique solutions of (37) if and only if there are  $c_1, \dots, c_k$  with  $c_i \geq 0$  and  $\sum_{i=1}^k c_i = 1$  such that for the corresponding error cone  $\mathcal{C}_i$  of  $\hat{\theta}_i$  and  $\mathcal{C}_0$  defined above,  $-\mathcal{C}_i \cap \sum_{j \neq i} \mathcal{C}_j = \{0\}$ , for  $i = 0, 1, \dots, k$ .

*Proof:* Before proofing the main result we need the following lemma, it is proved in appendix K.3.

**Lemma 11** For fixed  $\lambda_1, \dots, \lambda_k$ , suppose  $\sum_{i=1}^k \theta_i = \theta$  is a solution of decomposition (37) under this set of  $\{\lambda_i\}$ , and  $\dim(\text{span}\{\theta_i\}) = k$ . Let  $\mathcal{C}_i, i = 1, 2, \dots, k$  be the corresponding error cones of  $\{\theta_i\}$ ,  $c_i = \lambda_i R_i(\theta_i)/R(\theta)$  and  $\mathcal{C}_0$  be as defined in (59). The decomposition (37) for  $\theta$  is unique if and only if for any  $i = 0, 1, \dots, k$ ,

$$-\mathcal{C}_i \cap \sum_{j \neq i} \mathcal{C}_j = \{0\}. \quad (60)$$

We come to the main result and the necessity is obvious from lemma 11;

Without loss of generality, suppose  $c_i \geq 0$ . If such  $c_1, \dots, c_k$  exist for  $\hat{\theta}_1, \dots, \hat{\theta}_k$ , let  $\lambda_i = \frac{c_i}{R_i(\hat{\theta}_i)}$ . Suppose  $\theta_1, \dots, \theta_k$  is a set of optimal solution under the  $\lambda$  defined above. From 58 we can write the decomposition as  $\theta = \sum_{i=1}^k c'_i \theta'_i$  where  $c'_i$  is a coefficient of convex combination,  $c'_i \theta'_i = \theta_i$  and  $\lambda_i R_i(\theta'_i) = R(\theta)$  under coefficient  $\lambda_i$ .

665 If  $\theta_i \neq \hat{\theta}_i$  for some  $i$ , then as  $\sum_{i=1}^k \lambda_i R_i(\hat{\theta}_i) = \sum_{i=1}^k c_i = 1$ , we have

$$\lambda_i R_i(\theta_i) \leq 1 \Rightarrow R_i(c_i \theta_i) \leq R_i(\hat{\theta}_i).$$

666 Therefore  $c_i \theta_i - \hat{\theta}_i \in \mathcal{C}_i$  by definition. We also have

$$\sum_{i=1}^k \hat{\theta}_i + \sum_{i=1}^k \left(\frac{c'_i}{c_i} - 1\right) \hat{\theta}_i + \sum_{i=1}^k \frac{c'_i}{c_i} (c_i \theta_i - \theta_i) = \theta \Rightarrow \frac{c'_i}{c_i} (c_i \theta_i - \theta_i) = - \sum_{i=1}^k \left(\frac{c'_i}{c_i} - 1\right) \hat{\theta}_i$$

667 which is contradict to our condition. Therefore  $\hat{\theta}_i$  is a solution. Uniqueness is a direct conclusion of  
668 lemma 11. ■

669 Note that in this proof we set  $\lambda_i = \frac{c_i}{R_i(\theta_i)}$ . This is also a general way to choose the parameter  $\{\lambda_i\}$ .

### 670 K.3 Proof of Lemma 11

671 *Proof:* Without loss of generality, assume  $\theta_i \neq 0$ . According to (58), let

$$c_i = \frac{\lambda_i R_i(\theta_i)}{R(\theta)}, \text{ and } \theta'_i = \frac{1}{c_i} \theta_i.$$

672 Suppose  $\theta_i$  is a unique decomposition, for any  $\Delta_i \in \mathcal{C}_i$ , if  $\sum_{i=1}^k c'_i \lambda_i R_i(\theta'_i + \Delta_i) \leq R(\theta)$  and  
673  $\sum_{i=1}^k c'_i (\theta'_i + \Delta_i) = \theta$  for some  $c'_i \geq 0$ ,  $\sum_{i=1}^k c'_i = 1$ . Therefore we obtain the following decompo-  
674 sition of  $\theta$ :

$$\theta = \sum_{i=1}^k c_i \theta'_i + \sum_{i=1}^k (c'_i - c_i) \theta_i + \sum_{i=1}^k c'_i \Delta_i.$$

675 It is obvious from observation that  $\sum_{i=1}^k (c'_i - c_i) \theta_i + \sum_{i=1}^k c'_i \Delta_i = 0$  and  $\sum_{i=1}^k (c'_i - c_i) \theta_i \in \mathcal{C}_0$ ,  
676  $\sum_{i=1}^k c'_i \Delta_i \in \sum_{i=1}^k \mathcal{C}_i$ .

677 By minimal of  $R(\theta)$ ,  $\sum_{i=1}^k c'_i \lambda_i R_i(\theta'_i + \Delta_i) = R(\theta)$ . By our assumption, such decomposition of  $\theta$   
678 is unique, thus

$$\sum_{i=1}^k (c'_i - c_i) \theta_i = \sum_{i=1}^k c'_i \Delta_i = 0.$$

679 which implies  $-\mathcal{C}_0 \cap \sum_{i=1}^k \mathcal{C}_i = \{0\}$ . Uniqueness also give that  $c'_i \Delta_i = 0$  for each  $i = 1, 2, \dots, k$ .  
680 Therefore  $-\mathcal{C}_i \cap \sum_{j \neq i} \mathcal{C}_j = \{0\}$ .

681 If  $\theta_i$  is not a unique decomposition then there are some  $\Delta_i \neq 0$  such that  $\sum_{i=1}^k \Delta_i = 0$  and

$$\sum_{i=1}^k \lambda_i R_i(\theta_i + \Delta_i) = R(\theta).$$

682 Let

$$c''_i = \frac{\lambda_i R_i(\theta_i + \Delta_i)}{R(\theta)}, \text{ and } \theta''_i = \frac{1}{c''_i} (\theta_i + \Delta_i),$$

683 we have

$$\lambda_i R_i(\theta''_i) = R(\theta),$$

684 and hence  $\theta''_i - \theta'_i \in \mathcal{C}_i$  for  $\lambda_i R_i(\theta'_i) = R(\theta)$ . Unfold  $\theta'_i$  and  $\theta''_i$  gives

$$c''_i (\theta''_i - \theta'_i) = c''_i \left( \frac{1}{c''_i} - \frac{1}{c'_i} \right) \theta_i + \Delta_i.$$

685 Sum over all  $i$ , we get

$$\sum_{i=1}^k c''_i (\theta''_i - \theta'_i) = \sum_{i=1}^k c''_i \left( \frac{1}{c''_i} - \frac{1}{c'_i} \right) \theta_i,$$

686 which is contradict to our assumption that  $-\mathcal{C}_0 \cap \sum_{i=1}^k \mathcal{C}_i = \{0\}$ . Therefore the conclusion holds. ■

## Supplement References

- [25] A. Agarwal, S. Negahban, and M. J. Wainwright. Noisy matrix decomposition via convex relaxation: Optimal rates in high dimensions. *The Annals of Statistics*, 40(2):1171–1197, 2012.
- [26] A. Argyriou, R. Foygel, and N. Srebro. Sparse Prediction with the  $k$ -Support Norm. In *Advances in Neural Information Processing Systems*, Apr. 2012.
- [27] A. Beck and M. Teboulle. A fast iterative shrinkage-thresholding algorithm for linear inverse problems. *SIAM Journal on Imaging Sciences*, 2(1):183–202, 2009.
- [28] S. Boucheron, G. Lugosi, and P. Massart. *Concentration Inequalities*. Oxford University Press, 2013.
- [29] E. J. Candès, X. Li, Y. Ma, and J. Wright. Robust principal component analysis? *J. ACM*, 58(3):1–37, 2011.
- [30] V. Chandrasekaran, B. Recht, P. A. Parrilo, and A. S. Willsky. The Convex Geometry of Linear Inverse Problems. *Foundations of Computational Mathematics*, 12:805–849, 2012.
- [31] V. Chandrasekaran, S. Sanghavi, P. a. Parrilo, and A. S. Willsky. Rank-Sparsity Incoherence for Matrix Decomposition. *SIAM Journal on Optimization*, 21(2):572–596, 2011.
- [32] S. Chatterjee, S. Chen, and A. Banerjee. Generalized dantzig selector: Application to the  $k$ -support norm. In *Advances in Neural Information Processing Systems 27*. 2014.
- [33] S. Chen and A. Banerjee. Structured estimation with atomic norms: General bounds and applications. In *Advances in Neural Information Processing Systems 28*. 2015.
- [34] D. L. Donoho and X. Huo. Uncertainty principles and ideal atomic decomposition. *IEEE Transactions on Information Theory*, 47(7):2845–2862, 2001.
- [35] R. Foygel and L. Mackey. Corrupted Sensing: Novel Guarantees for Separating Structured Signals. *IEEE Transactions on Information Theory*, 60(2):1223–1247, Feb. 2014.
- [36] D. Hsu, S. M. Kakade, and T. Zhang. Robust matrix decomposition with sparse corruptions. *IEEE Transactions on Information Theory*, 57(11):7221–7234, 2011.
- [37] M. Ledoux and M. Talagrand. *Probability in Banach Spaces: Isoperimetry and Processes*, volume 23 of *A Series of Modern Surveys in Mathematics*. Springer Berlin, 2013.
- [38] M. B. McCoy. A geometric analysis of convex demixing. *Ph.D. Thesis, Caltech*, 2013.
- [39] M. B. McCoy and J. A. Tropp. The achievable performance of convex demixing. *arXiv*, 2013.
- [40] N. Parikh and S. Boyd. Proximal algorithms. *Foundations and Trends® in Optimization*, 1(3):127–239, 2014.
- [41] R. T. Rockafellar. *Convex Analysis*. Princeton University Press, 1970.
- [42] M. Talagrand. *Upper and Lower Bounds for Stochastic Processes*. A Series of Modern Surveys in Mathematics. Springer-Verlag Berlin Heidelberg, 2014.
- [43] J. A. Tropp. Convex recovery of a structured signal from independent random linear measurements. *arXiv*, May 2014.
- [44] R. Vershynin. Introduction to the non-asymptotic analysis of random matrices. In Y. Eldar and G. Kutyniok, editors, *Compressed Sensing*, pages 210–268. Cambridge University Press, Cambridge, Nov. 2012.
- [45] J. Wright, A. Ganesh, K. Min, and Y. Ma. Compressive principal component pursuit. *IEEE International Symposium on Information Theory*, pages 1276–1280, 2012.
- [46] E. Yang and P. Ravikumar. Dirty statistical models. *Advances in Neural Information Processing Systems*, pages 1–9, 2012.
